# Supplementary material for: Perspectives in the Application of High, Medium, and Low Molecular Weight Oat β-d-Glucans in Dietary Nutrition and Food Technology—A Short Overview
Source: MDPI journal article supplement (doi:10.3390/foods12061121), 2023-03-07
Supplement: s1 [file s1]

## Supplementary materials

**Table S1.** Comparison of biological activities of oat  $\beta$ -D-glucans in relation to  $M_w$ .

| MW range (kDa)                                                                                                 |               |                  | Source/samples         | Isolation/treatment                                                       | Administration/assay                             | Results                                                                                                                                         | Ref.       |
|----------------------------------------------------------------------------------------------------------------|---------------|------------------|------------------------|---------------------------------------------------------------------------|--------------------------------------------------|-------------------------------------------------------------------------------------------------------------------------------------------------|------------|
| LMW                                                                                                            | MMW           | HMW              |                        |                                                                           |                                                  |                                                                                                                                                 |            |
| 70                                                                                                             | 100, 133, 199 |                  | Milled oat             | Extraction with water, $\gamma$ -ray irradiation                          | In vitro assays                                  | • Antioxidant activity increases with $\gamma$ -radiation intensity                                                                             | 96         |
| 80, 61, 52                                                                                                     | 108, 144, 200 |                  |                        | Alkaline extraction, $\gamma$ -ray irradiation                            |                                                  | • Proven biocompatibility with human keratinocytes HaCat                                                                                        | 97         |
| 83                                                                                                             | 192           | 650              | Oat $\beta$ -D-glucans | Including in rice breads                                                  | Starch digestibility in vitro, PBGR              | • LMW $\beta$ -D-glucan reduces free glucose in rice breads                                                                                     | 55         |
| 82                                                                                                             | 325           | 1996             |                        | Enriched dough, $\beta$ -glucanase                                        |                                                  | • $M_w$ of oat $\beta$ -D-glucans negatively correlated with digestible starch                                                                  | 129        |
|                                                                                                                | 221-225       | 389-398          | Instant oatmeal        | Cooking with boiling water<br>Mixing with cold milk                       | Oral consumption                                 | • Formulations with HMW $\beta$ -D-glucan reduced PBGR effectively                                                                              | 133        |
| 59                                                                                                             |               | 1700             | Plant matrices         | Alkaline extraction, removal of proteins<br>Mixing with feed (1% w/w)     |                                                  | • Higher satiety of instant oatmeal than same caloric intake due to higher viscosity of $\beta$ -D-glucans                                      | 108        |
|                                                                                                                |               |                  |                        |                                                                           |                                                  | • LMW $\beta$ -D-glucans showed benefits in recovery from colitis                                                                               | 109        |
| 52, 76                                                                                                         | 153           | 393, 841<br>1980 |                        | Partial hydrolysis with $\beta$ -glucanase<br>Mixing with water (preload) | Oral consumption<br>PBGR                         | • HMW $\beta$ -D-glucans ameliorated inflammation in mucosa and submucosa                                                                       | 134        |
|                                                                                                                | 370           | 730, 1450        |                        | • LMW $\beta$ -D-glucans reduced pro-inflammatory cytokines               |                                                  | 134                                                                                                                                             |            |
|                                                                                                                | Not specified |                  | Oat $\beta$ -D-glucans | Partial hydrolysis<br>Supplementation to high fat meal                    | Oral consumption by mice                         | • HMW $\beta$ -D-glucans enhanced tissue recovery                                                                                               | 89,<br>121 |
| • Oat $\beta$ -D-glucans influence PBGR in healthy humans                                                      |               |                  |                        | 110                                                                       |                                                  |                                                                                                                                                 |            |
| • Lower $M_w$ of $\beta$ -D-glucans correlated with decreasing of time for blood glucose to peak after preload |               |                  |                        | 111                                                                       |                                                  |                                                                                                                                                 |            |
| • Hydrolysates reduced the body weight and improve lipid profile effectively than native $\beta$ -D-glucan     |               |                  |                        | 119                                                                       |                                                  |                                                                                                                                                 |            |
| 6                                                                                                              | 173, 275      | 1584             | Oat flour              | Extraction, acidic hydrolysis, oxidation                                  | <i>In vitro</i> models of bile acid binding      | • LMW $\beta$ -D-glucans improved appetite for colitis mice                                                                                     | 106        |
|                                                                                                                | 158, 173      | 1180, 1840       |                        | Acidic and/or enzymatic hydrolysis                                        |                                                  | • Both diets increased number of T cells in lymphocyte population, B cells and NK cells (higher in mice fed with LMW $\beta$ -D-glucans)        | 120        |
| 82                                                                                                             | 524           | >1000            | Oat bran concentrate   | Treatment with cell wall degrading enzymes                                | Oral consumption by humans<br>Exp. diet 3-4 days | • Both $\beta$ -D-glucans enhanced autophagy related genes expression and reduced of Caspase-3 expression and apoptosis in Crohn's disease mice | 123        |
| <100                                                                                                           | 200-500       | 1000             |                        |                                                                           | In vitro models of bile acid binding/retention   | • Enzymatically degraded $\beta$ -D-glucans slightly affected bile acids binding                                                                | 124        |
| 70                                                                                                             |               |                  |                        |                                                                           | In vitro assays                                  | • Viscous non-degraded $\beta$ -D-glucans caused demobilization of bile acids                                                                   | 67         |

|               |          |                  |                        |                                                                               |                                                                                                             |                                                                                                                                                                                                                                                                                                                                                                                                                                                                                                                                                                                                                                  |     |
|---------------|----------|------------------|------------------------|-------------------------------------------------------------------------------|-------------------------------------------------------------------------------------------------------------|----------------------------------------------------------------------------------------------------------------------------------------------------------------------------------------------------------------------------------------------------------------------------------------------------------------------------------------------------------------------------------------------------------------------------------------------------------------------------------------------------------------------------------------------------------------------------------------------------------------------------------|-----|
| Not specified |          |                  |                        |                                                                               |                                                                                                             | <ul style="list-style-type: none"><li>• It showed cytotoxic effect on A431 and Me45 cell lines, but was safe and no toxic for normal cell lines</li></ul>                                                                                                                                                                                                                                                                                                                                                                                                                                                                        |     |
| 81, 191       | 500      | 1040, 1508, 1800 | Oat $\beta$ -D-glucans |                                                                               |                                                                                                             | <ul style="list-style-type: none"><li>• LMW and HMW <math>\beta</math>-D-glucans decreased cell viability in A549 and H69AR cell lines; no cytotoxic effect on HaCaT cells</li><li>• HMW <math>\beta</math>-D-glucan increased MDA for H69AR and for A549</li><li>• LMW <math>\beta</math>-D-glucan altered nucleus structure in A549</li><li>• HMW <math>\beta</math>-D-glucan caused abnormalities of cytoskeleton in H69AR</li></ul>                                                                                                                                                                                          | 155 |
|               |          |                  |                        |                                                                               |                                                                                                             | <ul style="list-style-type: none"><li>• Oxygen radical uptake by oat <math>\beta</math>-D-glucans slightly correlated with <math>M_w</math></li><li>• HMW <math>\beta</math>-D-glucan decreased concentration of available glucose in small intestine; LMW <math>\beta</math>-D-glucan was less effective</li></ul>                                                                                                                                                                                                                                                                                                              | 138 |
| 68, 187       | 325, 461 | 5687             | Oat bran               | Extraction, acid hydrolysis<br>Mixing with food                               | In vitro model of glucose absorption and diffusion in rat small intestine                                   | <ul style="list-style-type: none"><li>• Digestion of starch proceeded slower in presence of both <math>\beta</math>-D-glucans</li><li>• Na<sup>+</sup>/K<sup>+</sup> ATPase activity was dependent on <math>M_w</math> and concentration of <math>\beta</math>-D-glucans and decreased with increasing of both values</li><li>• Concentration of <math>\beta</math>-D-glucans with defined <math>M_w</math> positively correlated with Na<sup>+</sup>/K<sup>+</sup> ATPase activity due to gastrointestinal motility</li><li>• <math>\beta</math>-D-Glucans especially HMW decreased activities of sucrase and maltase</li></ul> | 136 |
|               |          |                  |                        |                                                                               |                                                                                                             | <ul style="list-style-type: none"><li>• HMW <math>\beta</math>-D-glucans reduced inflammation in colon altering cytokines levels: elevating IL-10 and reducing IL-2 and TNF-<math>\alpha</math></li><li>• Diet supplementation with LMW and HMW oat <math>\beta</math>-D-glucan promoted significant increase in fecal LAB in healthy and enteritis rats</li></ul>                                                                                                                                                                                                                                                               | 113 |
|               |          |                  |                        |                                                                               |                                                                                                             | <ul style="list-style-type: none"><li>• LMW <math>\beta</math>-D-glucans reduce lipid hydroperoxidases in rats spleens after LPS injections</li></ul>                                                                                                                                                                                                                                                                                                                                                                                                                                                                            | 139 |
| 70            |          | 2180             |                        | Alkali extractions, freeze-milling<br>Exp. diet with 1% oat $\beta$ -D-glucan | Oral consumption by rats/mice                                                                               | <ul style="list-style-type: none"><li>• HWM <math>\beta</math>-D-glucan decreased expression of Granzyme C-like protein reducing inflammation, reduced expression of gene <i>Serp2</i> (inhibition of immune response in mice with enteritis), and boosted expression of gene <i>Nlrp1</i> (inhibition of inflammation and tumorigenesis)</li><li>• LMW <math>\beta</math>-D-glucan increased IL34 and downregulated prostaglandin E receptor 3, both related to inflammatory processed.</li></ul>                                                                                                                               | 114 |
|               |          |                  |                        |                                                                               |                                                                                                             | <ul style="list-style-type: none"><li>• HMW <math>\beta</math>-D-glucan decreased lipid peroxidases in stomach of enteritis rats</li><li>• LMW oat <math>\beta</math>-D-glucan lowered LOOH and TBA in stomach and liver</li><li>• Both HMW and LMW oak <math>\beta</math>-D-glucans decreased concentration of toxic 7-ketocholesterol and 25-hydroxicholesterol</li></ul>                                                                                                                                                                                                                                                      | 140 |
|               |          |                  |                        |                                                                               |                                                                                                             | <ul style="list-style-type: none"><li>• HMW <math>\beta</math>-D-glucan reduced NK in blood of healthy rats</li><li>• Both <math>\beta</math>-D-glucans decreased total and B lymphocytes and granulocytes in enteritis rats with more pronounced effect for HMW <math>\beta</math>-D-glucan</li><li>• Monocytes decreased in number in rats fed with HMW <math>\beta</math>-D-glucan</li></ul>                                                                                                                                                                                                                                  | 115 |
|               |          |                  |                        |                                                                               |                                                                                                             | <ul style="list-style-type: none"><li>• LMW and HMW <math>\beta</math>-D-glucans reduced level of lipid oxidation in stomach, with more pronounced effect for HMW <math>\beta</math>-D-glucan</li></ul>                                                                                                                                                                                                                                                                                                                                                                                                                          | 116 |
| 10, 200       | 500      |                  |                        | Extraction with hot water<br>Labelling with FITC [109]                        | Solutions of oat $\beta$ -D-glucans were injected intra-peritoneally<br>Control was PBS or dextran solution | <ul style="list-style-type: none"><li>• LMW <math>\beta</math>-D-glucan (<math>M_w</math> 200 kDa) effectively inhibited primary tumors growth; lowest incidence of lung metastases; IFN-<math>\gamma</math>, TNF-<math>\alpha</math>, Th-1 chemokines: CXCL9 and CXCL10; IRF1, PDL-1 levels were increased, tumors were infiltrated with T cells, which produced Granzyme B and IFN-<math>\gamma</math></li><li>• CD11 b+ cells, dendritic cells, CD11 c+, T cells and presumably NK cells supported immune control of B16F10 treated with oat <math>\beta</math>-D-glucan</li></ul>                                            | 157 |
|               | 165      | 1713             | Oat kernels            | Enzymatic and hot water extractions<br>Microwave heating, steaming            | Fermentation system with fecal microbiota                                                                   | <ul style="list-style-type: none"><li>• Microwave treatment reduces <math>M_w</math> of <math>\beta</math>-D-glucan and promotes growth of butyrate-producing bacteria Blautia and Dialister</li></ul>                                                                                                                                                                                                                                                                                                                                                                                                                           | 146 |

|  |  |  |  |                                                                                                                                                                                                                                                                             |     |
|--|--|--|--|-----------------------------------------------------------------------------------------------------------------------------------------------------------------------------------------------------------------------------------------------------------------------------|-----|
|  |  |  |  |                                                                                                                                                                                                                                                                             |     |
|  |  |  |  | <ul style="list-style-type: none"><li>• Fermentation slurries with MMW <math>\beta</math>-D-glucan yielded more SCFA</li><li>• MMW and HMW oat <math>\beta</math>-D-glucans significantly reduced glucose iAUC, insulin iAUC and glucose and insulin iPeak values</li></ul> | 122 |
